# Synthetic genome rearrangement reveals dynamics of chromosome evolution shaped by hierarchical chromatin organization

**Authors:** Sijie Zhou<sup>1,2†</sup>, Yi Wu<sup>1,2†</sup>, Yu Zhao<sup>3†</sup>, Zhen Zhang<sup>1,2</sup>, Limin Jiang<sup>4</sup>, Lin Liu<sup>6</sup>,  
Yan Zhang<sup>1</sup>, Jijun Tang<sup>4,5</sup>, and Ying-Jin Yuan<sup>1,2,7\*</sup>

## Affiliations:

<sup>1</sup>Frontiers Science Center for Synthetic Biology (Ministry of Education), Tianjin  
University, Tianjin, 300072, China

<sup>2</sup>Key Laboratory of Systems Bioengineering (Ministry of Education), School of  
Chemical Engineering and Technology, Tianjin University, Tianjin, 300072, China

<sup>3</sup>Institute for Systems Genetics, NYU Langone Health, New York, NY 10016, USA

<sup>4</sup>School of Computer Science and Technology, College of Intelligence and  
Computing, Tianjin University, Tianjin, 300350, China

<sup>5</sup>Department of Computer Science, University of South Carolina, SC 29208, USA

<sup>6</sup>Frasergen Bioinformatics Co., Ltd., Wuhan 430000, China

<sup>7</sup>Lead contact

<sup>†</sup>These authors contributed equally.

\*Correspondence: Ying-Jin Yuan, E-mail: yjyuan@tju.edu.cn

20 **Abstract:**

21 Synthetic genome evolution provides a dynamic approach to systematically and  
 22 straightforwardly explore evolutionary processes. SCRaMbLE is an evolutionary  
 23 system intrinsic to the synthetic yeast genome that can rapidly drive structural  
 24 variations. Here, we detect over 260,000 rearrangement events after SCRaMbLEing  
 25 of a novel yeast strain harboring 6 synthetic yeast chromosomes. Remarkably, we find  
 26 that the rearrangement events exhibit a specific landscape of rearrangement frequency.  
 27 We further reveal that the landscape is shaped by combinatorial effects of chromatin  
 28 accessibility and spatial contact probability. The rearrangements tend to occur in 3D  
 29 spatially proximal and chromatin-accessible regions. Enormous numbers of  
 30 rearrangements by SCRaMbLE provide a driving force to potentiate directed genome  
 31 evolution, and investigation of the rearrangement landscape offers mechanistic  
 32 insights into the dynamics of genome evolution.

## 33 **Introduction:**

34 Studying the processes and mechanisms of genome evolution is critical to  
 35 understanding genetic diversity and species diversity at the genomic level<sup>1-4</sup>. *S.*  
 36 *cerevisiae*, a powerful model organism for eukaryotic genome evolution<sup>5-7</sup> has been  
 37 subjected to comparative genomic studies that provided mechanistic insights<sup>8-12</sup>.  
 38 These studies relied on relatively static genomic sequences and may have missed  
 39 many details of dynamic processes. Synthetic genomes, assembled from scratch and  
 40 incorporated with a variety of designer features, have greatly facilitated the study of  
 41 genome evolution and engineering, such as genome minimization<sup>13</sup>, genetic codon  
 42 recoding<sup>14, 15</sup>, introduction of synthetic parts<sup>16</sup> and data storage<sup>17, 18</sup>. SCRaMbLE with  
 43 symmetrical loxP sites (loxPsym) positioned in the 3' untranslated regions (3' UTRs)  
 44 of all nonessential genes in the Synthetic Yeast Genome Project (Sc2.0) has also been  
 45 used in the study of genome evolution recently<sup>16, 19</sup>. Induced Cre recombinase activity  
 46 quickly triggers recombination between loxPsym sites and generates structural  
 47 variations, including deletions, inversions, duplications, and translocations<sup>20-27</sup>.

48

49 In this study, we first consolidated six individual synthetic chromosomes (synII,  
 50 synIII, synV, synVI, synIXR and synX) into a single haploid strain with an  
 51 orthogonal site-specific recombination system, which enabled the eliminations of  
 52 counterpart native chromosomes<sup>19, 28-32</sup>. In this strain with nearly half a synthetic  
 53 genome, we induced SCRaMbLE and generated massive rearrangement events with  
 54 both intra- and inter-chromosomal recombination. We comprehensively sequenced

55 this SCRaMbLEd pool and detected over 260,000 rearrangement events via a  
56 loxPsym junction analysis method. By analyzing each rearrangement event, we  
57 uncovered a stable rearrangement landscape for synthetic chromosomes that was  
58 correlated to local chromatin structures and three-dimensional genome architecture  
59 analyzed via Assay for Transposase-Accessible Chromatin sequencing (ATAC-seq)  
60 and genome-wide chromosome conformation capture (Hi-C). Our study provides  
61 insight into the combinatorial effect of hierarchical chromatin organization on the  
62 dynamics of genome evolution.

## 63 **Results**

### 64 **Consolidation and SCRaMbLE of six synthetic chromosomes**

65 To build the strain with multiple synthetic chromosomes, we used a stepwise method,  
66 starting with six individual yeast strains that contain single synthetic chromosomes  
67 (synII, synIII, synV, synVI, synIXR, synX). First, we obtained two haploid strains of  
68 opposite mating types, yYW169 (synV, synX) and yZY192 (synII, synIII, synVI and  
69 synIXR), using endoreduplication intercrossing<sup>16</sup>. To accelerate the consolidation, we  
70 developed a new strategy using chromosome elimination by Vika/vox, a site-specific  
71 recombination system orthogonal to Cre/loxP (Fig. 1a)<sup>33, 34</sup>. First, we built a  
72 heterozygous diploid strain yYW268 by mating yYW169 and yZY192. The native  
73 chromosomes (II, III, V, VI, IX and X) were eliminated successively, with their  
74 centromeres excised by vox recombination (Supplementary Fig.1). Following  
75 endoreduplication, sporulation and tetrad dissection, one haploid strain (yYW394)  
76 with the six aforementioned native chromosomes swapped with synthetic

77 chromosomes was obtained, comprising ~2.61 Mb (~22.0% of the yeast genome)  
 78 (Supplementary Table 1). Its karyotype and genome sequence were confirmed by  
 79 pulsed-field gel electrophoresis and Whole Genome Sequencing (WGS)  
 80 (Supplementary Fig.2b, d). The yYW394 strain grew robustly at 30 °C but exhibited a  
 81 growth defect at 37 °C (Supplementary Fig.2c). To recover its fitness to wild-type  
 82 levels, adaptive laboratory evolution of yYW394 was performed and generated a new  
 83 healthy strain yZSJ025, which was used for further analysis (Supplementary Fig.2).

84  
 85 A Cre recombinase expression plasmid pYW085 (pRS413-pCLB2-Cre-EBD) was  
 86 transformed into yZSJ025, comprising 894 loxP sites (Supplementary Fig.3).  
 87 SCRaMbLE was induced by addition of  $\beta$ -estradiol. The SCRaMbLEd cells were then  
 88 diluted in fresh YPD liquid medium without  $\beta$ -estradiol (Fig. 1a), and subjected to  
 89 deep sequencing (~600,000 $\times$ ). All reads (150 bp each) were screened for the presence  
 90 of loxP sites, then aligned to the reference sequence of original synthetic  
 91 chromosomes. Those with flanking sequences different from the references, hereafter  
 92 called rearrangement reads, were then used to identify and classify rearrangement  
 93 events<sup>25</sup> (Supplementary Fig.4). Identical reads were considered as one rearrangement  
 94 event. Totally, 263,520 rearrangement events, including 124,499 (47.24%) intra- and  
 95 139,021 (52.76%) inter-chromosomal events were detected (Fig. 1b, c). We further  
 96 analyzed the intra-chromosomal rearrangement events and found 62,106 (23.57%)  
 97 inversions, 22,526 (8.55%) deletions and 39,867 (15.13%) complex rearrangement  
 98 events, such as duplication and circularization (Fig. 1d and Supplementary Fig.4). We

99 also counted the reads from each rearrangement. The numbers of identical reads  
100 represented the frequencies of corresponding rearrangement events. The  
101 inter-chromosomal recombination only accounted for 9.87% of total read numbers,  
102 indicating that these are relatively low frequency events compared to  
103 intra-chromosomal rearrangements. We next investigated whether there is any  
104 chromosome preference for rearrangements. To answer this question, we plotted the  
105 number of rearrangements for each chromosome against the number of loxPsym sites  
106 in that chromosome. As expected, the number of rearrangements correlates with the  
107 number of loxpsym sites per chromosome ( $r = 0.96$ ,  $p = 0.002$ ) (Fig. 1e).

108

#### 109 **A specific rearrangement pattern of the synthetic yeast chromosomes**

110 In theory, SCRaMbLE can generate rearrangements between any two loxPsym sites  
111 on synthetic chromosomes. However, different chromosomal loci showed high or low  
112 rearrangement frequencies (Fig. 1b, c). To estimate the local rearrangement  
113 frequencies along the synthetic chromosomes in our SCRaMbLED pool, we counted  
114 the number of rearrangement reads from each loxPsym site, generating a landscape of  
115 rearrangement frequencies (Fig. 2a). Notably, rearrangement reads were identified  
116 from all 877 loxPsym sites, indicating the sequencing coverage was sufficient to  
117 cover all the loci. The loxPsym sites differed from each other in rearrangement  
118 frequencies, ranging from 1,027 to 44,353 per site. We selected 90 loxPsym sites  
119 (~10%) with the highest or lowest rearrangement frequencies as hotspots or coldspots,  
120 respectively, for further analysis. Rearrangement frequencies of hotspots were higher

121 than 17,800 per site while for coldspots, the frequencies were lower than 3,400 per  
122 site. These rearrangement frequencies were significantly different from the average  
123 frequency of all loxPsym sites (Fig. 2b). Interestingly, the rearrangement frequency  
124 landscapes of independent SCRaMbLE experiments were highly reproducible for all  
125 the synthetic chromosomes, indicating certain areas of the genome have the potential  
126 to undergo rearrangement at higher frequency (Supplementary Figs.5, 6).

127

128 We also compared rearrangement patterns of the same synthetic chromosome in  
129 separate strains containing different numbers of synthetic chromosomes. Similar  
130 intra-chromosomal rearrangement patterns were observed for synV in the three  
131 synV-containing strains (yXZX846, yYW169 and yZSJ025) (Fig. 2c and  
132 Supplementary Fig 7a-c). The same result was also observed for synX in the two  
133 synX-containing strains (yYW169 and yZSJ025) (Supplementary Fig.7d, e). Overall,  
134 our results demonstrate that the patterns of SCRaMbLE followed the same biological  
135 reason on each synthetic chromosome with reproducible rearrangement hotspots and  
136 coldspots.

137

### 138 **Rearrangement frequency correlates with chromatin accessibility**

139 To determine if the specific rearrangement patterns we observe are due to an  
140 underlying biological mechanism, we further investigated the genomic landscape.  
141 SCRaMbLE requires physical interaction between Cre recombinase and loxPsym sites,  
142 suggesting the importance of chromatin accessibility in determining rearrangement

143 frequency in SCRaMbLED cells. To test this hypothesis, we measured genome-wide  
 144 chromatin accessibility in yZSJ025 strain by ATAC-seq<sup>35</sup>. The ATAC-seq signals from  
 145 the window containing 400 bp upstream and downstream of each loxPsym site were  
 146 collected and processed. The signals from each rearrangement hotspot and coldspot  
 147 were normalized with the average signals of all 877 loxPsym sites. Interestingly,  
 148 statistical analysis showed that the average ATAC-seq signals of hotspots were  
 149 significantly higher, while coldspot signals were significantly weaker (Fig. 3a). The  
 150 rearrangement frequencies and ATAC-seq signals of a typical loxPsym hotspot and  
 151 coldspot from synX are shown in Fig. 3b. As a coldspot, the loxPsym site in *SET4* 3'  
 152 UTR had a weak ATAC-seq signal, while as a hotspot, the loxPsym site in *PRY3* 3'  
 153 UTR showed a strong ATAC-seq signal. In addition, we also observed that  
 154 nucleosome occupancy was relatively low in the hotspots and high in the coldspots  
 155 (Supplementary Fig.8). Both ATAC-seq and nucleosome occupancy indicated that  
 156 chromatin accessibility is critical for determining patterns of rearrangement  
 157 frequencies.

158

159 We also aligned the hotspots and coldspots to the corresponding region in native  
 160 chromosomes. Using the same approach as before, we extracted and analyzed  
 161 pre-published ATAC-seq data from wild-type yeast<sup>35</sup> (Supplementary Fig.9).  
 162 ATAC-seq signals peaked at the positions of the hotspots, and remained weak at the  
 163 coldspots in all six chromosomes, suggesting that sequence modifications of Sc2.0 do  
 164 not perturb chromatin accessibility.



165

# 166 **Rearrangement frequency also correlates with 3D chromosome conformation**

167 Next, we aimed to explore whether rearrangement frequency is correlated with the  
 168 spatial proximity of loxPsym sites. Our SCRaMbLE system provided a unique  
 169 platform to statistically evaluate the role of spatial proximity in chromosomal  
 170 rearrangements. A genomic chromosome conformation capture approach (Hi-C) was  
 171 thus carried out for yZSJ025, generating a contact map with the frequencies of spatial  
 172 contacts between any two genomic loci (Supplementary Fig.10). We extracted contact  
 173 frequencies from the synthetic chromosomes (Fig. 4a), and plotted rearrangement  
 174 frequencies in a similar heatmap to facilitate direct comparison (Fig. 4b). The regions  
 175 near the diagonal represent proximal loci in each chromosome. Consistent with this,  
 176 these intra-chromosomal regions were the “hottest” in the Hi-C map (Fig. 4a), and  
 177 they also exhibited the highest rearrangement frequency (Fig. 4b). Rearrangements  
 178 tended to occur most frequently between adjacent loxPsym sites for all synthetic  
 179 chromosomes as shown by statistical analysis of all rearrangement reads  
 180 (Supplementary Fig.11).

181

182 Notably, the inter-chromosomal contact probability in the regions of centromeres and  
 183 telomeres was obviously higher than that in other regions (Fig. 4a), consistent with  
 184 centromeres being clustered around the spindle pole body and telomeres being  
 185 clustered with the nuclear envelope for both wild-type<sup>36</sup> and synthetic chromosomes<sup>37</sup>  
 186 (Fig. 4c). Compared to other regions, pericentromeric regions exhibited higher

187 inter-chromosomal rearrangement frequency (Fig. 4b, d). Similar results were found  
188 for the peritelomeric regions of the synthetic chromosomes (Fig. 4b, e). Taken  
189 together, our results suggested that rearrangement events are generally more likely to  
190 occur between genomic loci in spatial proximity.

191

## 192 **Combinatorial effects of chromatin accessibility and chromosome conformation**

193 As both chromatin accessibility and spatial proximity influence rearrangement  
194 frequency, we hypothesized that they have combinatorial effects on yeast  
195 chromosome organization. We tested our proposed model based on individual  
196 rearrangement events. If two loxPsym sites have similar chromatin accessibility (Fig.  
197 5a), the frequency of rearrangement events was determined by their spatial proximity  
198 (Fig. 5b). For loxPsym sites with similar spatial proximity (Fig. 5c), the  
199 rearrangement frequency was mainly affected by their chromatin accessibility (Fig.  
200 5d). Most interestingly, if two loxPsym sites had open chromatin but were distant in  
201 space, they might have a similar recombination frequency compared to other pairs of  
202 loxPsym sites that were proximal but buried in closed chromatin structures (Fig. 5e, f).  
203 In other words, the effect of chromatin accessibility on rearrangement frequency  
204 could be compensated for by the difference of spatial proximity, and *vice versa*. More  
205 generally, chromatin architecture and spatial conformation in the yeast genome  
206 affected the rearrangement frequency in a combinatorial manner during SCRaMbLE.

207

## 208 **Discussion**

209 In this study, we induced SCRaMbLE in a novel strain with multiple synthetic  
 210 chromosomes. Over 260,000 rearrangement events were detected in the SCRaMbLEd  
 211 pool, covering all 894 loxPsym sites. This finding revealed the tremendous plasticity  
 212 of the yeast genome. Previous studies of SCRaMbLE were mainly focused on the  
 213 correlation of chromosomal rearrangement with nucleotide sequence<sup>21, 23, 25, 27, 38</sup>. Here,  
 214 we discovered that the rearrangement frequency landscape was molded by chromatin  
 215 accessibility and spatial proximity from an epigenetic perspective.

216  
 217 The biochemical essence of SCRaMbLE is recombination between pairs of different  
 218 loxPsym sites in synthetic chromosomes catalyzed by Cre recombinase<sup>39</sup>. We  
 219 speculated that local chromatin structure affected rearrangement by acting on the  
 220 accessibility of Cre to loxPsym sites and that 3D chromosome conformation affected  
 221 the contact probability of any two loxPsym sites. The use of synthetic chromosomes  
 222 and SCRaMbLE allowed us to statistically reveal that inter-chromosomal  
 223 rearrangement hotspots strikingly clustered at the peritelomeric and pericentromeric  
 224 regions. Our results are consistent with previous reports that increased  
 225 inter-chromosomal reshuffling occurred in the peritelomeric regions of domesticated  
 226 and wild yeast isolates during genome evolution<sup>8, 11</sup>. The peritelomeric regions are  
 227 functionally enriched for genes involved in secondary metabolism and stress  
 228 responses that contribute to environmental adaptation<sup>40-43</sup>. High frequency of  
 229 rearrangement in these regions could thus be an important driving force for evolution.  
 230 Besides, inter-chromosomal rearrangements would result in swapping of

231 chromosomal arms between two chromosomes. Recent genomic studies demonstrated  
232 that such rearrangements can cause reproductive isolation and promote incipient  
233 speciation<sup>44-46</sup>. Taking the combinatorial effect of chromatin accessibility and  
234 chromosome conformation into consideration, we speculated that chromatin structures  
235 might also play an important role in genome evolution in terms of the effects on the  
236 rearrangements in peritelomeric and pericentromeric regions.

237

238 In eukaryotic cells, altered 3D genome organization together with chromosomal  
239 structural variations have also been shown to be oncogenic, as in breast or ovarian  
240 cancers<sup>47-49</sup>. Most recently, a synthetic genomics approach was utilized to study  
241 spatial regulatory elements during embryonic development by reconstituting the *HoxA*  
242 cluster and many variants<sup>50</sup>. Our SCRaMbLE system, with multiple synthetic  
243 chromosomes, may also provide a unique platform to enable experimental  
244 characterization and a more mechanistic study of the role of genome rearrangement in  
245 disease.

246

247 All 16 synthetic yeast chromosomes and the novel tRNA neochromosome will be  
248 consolidated by chromosome swapping to build the final Sc2.0 strain<sup>16, 28, 51</sup>. The  
249 flexible and controllable synthetic yeast genome provides a unique model to  
250 systematically interrogate and explore the dynamics of eukaryotic genome evolution.  
251 The investigation of a large number of rearrangements indicated the tremendous  
252 plasticity of the yeast genome and the importance of hierarchical chromatin

253 organization to the regional rates of chromosomal variation during genome evolution.

254 These findings provide crucial insights that the variability and complexity of synthetic

255 genome design can be further increased. Meanwhile, the influence of chromatin

256 organization needs to be considered in the design and engineering of higher organism

257 genomes.

258 **Materials and Methods:**

259

260 **Strains and plasmids**

261 The plasmids and yeast strains used in this study were listed in Supplementary Table

262 4.

263

264 **Synthetic chromosome sequences and versions**

265 The haploid draft strain yYW394 contains multiple synthetic chromosomes of synII

266 (chr02\_9\_03), synIII (chr03\_9\_02), synV (chr05\_9\_04), synVI (chr06\_9\_03), synIXR

267 (genebank JN020955), and synX (chr10\_9\_01) as published before<sup>19, 28-32</sup>. The final

268 strain yZSJ025 contains the same synthetic chromosomes except some variants to

269 improve its fitness, as listed in Supplementary Table 2. The genome sequencing data

270 was submitted to NCBI Sequence Read Archive (SRA) under accession number

271 PRJNA705059.

272

273 **Plasmid circuits construction**

274 All plasmids were constructed using standard molecular cloning techniques and

transformed into *E. coli* strain TOP 10 with standard protocols. Plasmid constructs were verified by restriction digests and Sanger sequencing by Genewiz. Restriction endonucleases and Phusion PCR kits were used from New England BioLabs. The KanMX-vox-CEN3-vox and hphNT1-vox-CEN3-vox were synthesized from Genewiz. (The distance between left vox and CENs is 100bp; the distance between right vox and CENs is 123bp). The 1kb homologous segments near the centromere of wild-type chromosome were PCR amplified from genome of BY4741. The wtII-hphNT1-vox-CEN3-vox, wtV-hphNT1-vox-CEN3-vox, wtVI-hphNT1-vox-CEN3-vox, wtIII-KanMX-vox-CEN3-vox, wtIX-KanMX-vox-CEN3-vox, and wtX-KanMX-vox-CEN3-vox were assembled with Gibson assembly into pUC19 linearized by *SalI* and *BamHI* digestion<sup>52</sup>.

## Yeast transformation

Yeast transformations in this study were performed with LiAc/SS/PEG method<sup>53</sup>. Briefly, the overnight YPD saturate culture of yeast cells were diluted into 5 mL fresh YPD medium for another 4-6 h culture starting from A<sub>600</sub> of 0.2 at 30 °C in a shaker incubator at 220 rpm. Cells were washed with ddH<sub>2</sub>O followed by 0.1 M LiAc, and chilled on ice. 620 µL of 50 % polyethylene glycol (PEG-3350), 40 µL of salmon sperm DNA (100 mg/mL), 90 µL of 1 M LiAc, and 150 µL plasmid solution (100 ng DNA) were added in order to the cell pellet. The mixture was vortexed briefly to resuspend the cells and incubated at 30 °C for 30 min. 90 µL of dimethyl sulfoxide (DMSO) was then added to the mixture and a heat-shock for 18 min at 42 °C was

performed. Cells were then collected and resuspended with 5 mM CaCl<sub>2</sub>. 100 µL of the cell suspension was then plated on SC–His for the selection of transformants. YPD, yeast extract peptone dextrose; SC, synthetic complete medium.

### **Yeast mating process**

Yeast strains of opposite mating types were incubated in selective medium overnight. 500 µL of each culture was washed with ddH<sub>2</sub>O, and the pellets were resuspended with 3 mL of YPD, and incubated at 30 °C in a shaker incubator at 220 rpm for 8 h. 100 µL of the mating suspension was subsequently sprayed on a selective medium agar plate for single colonies after incubation at 30 °C for 2 days. PCR screening for the MAT locus were performed to select diploid colonies.

### **PCRTag assay for native chromosome elimination**

PCRTags were landmarks in synthetic chromosomes including the peritelomeric and pericentromeric regions<sup>16</sup>. The loss of wild-type PCRTags associated with native chromosomes and the retained synthetic PCRTags on synthetic chromosomes were validated by colony PCR to assess the elimination of wtII, III, V, VI, IX, and X, using the primers listed in Supplementary Table 5.

### **Construction of a poly-synthetic strain using chromosome elimination with**

#### **Vika/vox**

WtII-hphNT1-vox-CEN3-vox and wtIX-KanMX-vox-CEN3-vox constructs were

linearized by *SaI*I and *Bam*HI, and integrated into the centromere regions of native chromosomes II and IX in the strain with synV and synX, which were then mated with the strain with synII, synIII, synVI and synIXR. Heterozygous diploid strains were transformed with a pGAL-Vika plasmid with *LEU2* auxotrophic marker<sup>33</sup>, and then inoculated in liquid YP+galactose (2%) medium for 12-18 h at 30 °C to turn on the Vika/vox recombination system. The entire native chromosome II and IX were eliminated after Vika recombinase expression was induced. 200 µL of culture was spread on plates with SC–Leu with dextrose medium. After incubation for 2 days at 30 °C, the single colonies were replicated to the plates with YPD+G418 (200ug/mL) and SC+Hygromycin B (200ug/mL) medium, to identify the colonies lost with native chromosome II and IX. Using PCRtag assays described above. Following the same strategy, wtV, wtX, wtVI, and wtIII were eliminated sequentially, generating a 2n–6 strain.

332

### 333 **Meiosis and sporulation**

The 2n–6 strain was first transformed with a plasmid containing *MATa* and *HIS3* marker. Yeasts were incubated in SC–His medium overnight at 30 °C with shaking at 220 rpm, after which 200 µL of the culture was transferred to 3 mL of YPD and then incubated at 30 °C with shaking at 220 rpm for 14 h for early stationary phase. The cells were washed with sterile ddH<sub>2</sub>O three times. 1 µL of 50× sporulation medium, 500 µL of the required amino acids (uracil, leucine), and 150 µL of 10% yeast extract were mixed together and then diluted with sterile ddH<sub>2</sub>O to a volume of 50 mL. All



341 washed cells were transferred into sporulation solution and mixed well, which were  
342 subjected to sporulation at room temperature for 5 days followed by dissection.

343

#### 344 **Preparation of SCRaMbLEd pool**

345 The SCRaMbLE experiment using pCLB2-Cre-EBD-CYC1t was performed as  
346 described before<sup>24</sup>. Briefly, the yeast strains were transformed with the plasmid  
347 pCLB2-Cre-EBD-CYC1t, and selected on SC-His agar plates. The SCRaMbLE  
348 system was triggered upon  $\beta$ -estradiol. Yeast cells were then harvested by  
349 centrifugation at 2,000  $\times$ g, washed twice with ddH<sub>2</sub>O to remove  $\beta$ -estradiol,  
350 resuspended in 50 mL of YPD liquid medium, and incubated for 24 h to generate the  
351 pool of SCRaMbLEd cells for further analysis.

352

#### 353 **High-depth whole-genome sequencing**

354 The next generation sequencing library was prepared using VAHTS Universal DNA  
355 Library Prep Kit for Illumina (Cat# ND607), following the manufacturer's protocol  
356 with 1,000 ng input DNA. The prepared libraries were quantified by Qubit3.0  
357 Fluorometer (Invitrogen, Carlsbad, CA, USA). These libraries with different indexes  
358 were multiplexed and loaded on an Illumina NovaSeq instrument according to  
359 manufacturer's instructions (Illumina, San Diego, CA, USA). Sequencing was carried  
360 out using a 150 bp paired-end (PE) configuration; image analysis and base calling  
361 were conducted by the NovaSeq Control Software (HCS) + RTA 2.7 (Illumina) on the  
362 NovaSeq instrument. The sequencing libraries were made without PCR amplification

363 to avoid creating artifact junctions driven by hybridization of loxPsym sites.  
 364 Furthermore, in order to accurately estimate copy number of target regions,  
 365 amplification-free sequencing was applied to decrease the likelihood that an  
 366 appreciable proportion of these sequences would be duplicated and preserve a more  
 367 even distribution of read coverage across the targeted sequencing regions.

368

### 369 **Analyses of novel junctions**

370 Structural variations on the synthetic chromosomes were identified by the alignment  
 371 of loxPsym sites and neighboring sequences to the yZSJ025 reference genome  
 372 sequence. Reads containing loxPsym sites and their extensions by 116 bp on both  
 373 sides were extracted. The following criteria were used to identify and screen  
 374 rearrangements for further studies: (1) Reads containing the entire 34 bp loxPsym site  
 375 sequences with flanking sequences belonging to two loxPsym sites of the reference;  
 376 (2) Reads with one end less than 4 bp apart from loxPsym were excluded; (3) Reads  
 377 containing two or more mismatched bases were excluded.

378 Identical reads were considered as a result of a single rearrangement event. Only two  
 379 or more reads endorsing a rearrangement event were included in the further analyses.

380

### 381 **ATAC-seq**

382 A total of ~1,000,000 yeast cells were washed with 1 mL RSB buffer (10mM  
 383 Tris-HCl pH 7.4, 10 mM NaCl, 3 mM MgCl<sub>2</sub>) once and incubated for 60 min at 37 °C  
 384 using zymolyase to digest cell walls (0.015 g/mL, Solarbio). Then the cell was

385 resuspended in 1 mL lysis buffer (10 mM Tris-HCl pH 7.4, 10 mM NaCl, 3 mM  
386 MgCl<sub>2</sub>, 0.5% NP40, 0.1% Digitonin, 0.1% Tween-20, 1xProtease inhibitor) for 10  
387 min at 4°C to lyse the yeast cell membrane to obtain the nucleus. Immediately  
388 following the nuclei prep, the pellet was resuspended in the Tn5 transposase reaction  
389 mix. The transposition reaction was carried out for 30 min at 37 °C. Tn5 transposed  
390 DNA were purified by AMPure DNA magnetic beads. A qPCR reaction was  
391 performed on a subset of the DNA to determine the optimum number of PCR cycles.  
392 The amplified libraries were run on an Agilent Tapestation 2100 (Agilent  
393 Technologies) to detect size distribution of library fragments. Biological replicates  
394 were performed in duplicate for all ATAC experiments. The final library was  
395 sequenced on an Illumina Nova-seq PE150 platform. Call peaks on replicates,  
396 self-pseudoreplicates using MACS2<sup>54</sup> (--nomodel --extsize 200 --shift -100). The  
397 nucleotat version 0.3.4 was used to call nucleosome positions and occupancy by  
398 ATAC data with default parameters.

399

#### 400 **Analyses of the ATAC-seq signals**

401 The average ATAC FPKM values of 90 hotspots, 90 coldspots and all 877 loxPsym  
402 sites in each bin were calculated. The mean ATAC-seq signals in the 400 bp  
403 surrounding hotspots and coldspots were normalized by the mean signal of all 877  
404 loxPsym sites as follows :

$$\text{Normalized signal} = \frac{\text{Mean hotspot (or coldspot) signal}}{\text{Mean signal of all 877 loxPsym sites}}$$

405

## 406 **Hi-C sequencing**

407 The genomic DNA from exponential phase cells was cross-linked and digested with  
 408 200U *Mbo*I (NEB) as previously described<sup>55</sup>. Restriction fragment ends were labeled  
 409 with biotinylated cytosine nucleotides by biotin-14-dCTP (TriLINK) followed by  
 410 ligation. Purified DNA was sheared to a length of ~400 bp. Point ligation junctions  
 411 were pulled down with Dynabeads MyOne Streptavidin C1 (ThermoFisher). The Hi-C  
 412 library for Illumina sequencing was prepped by NEBNext Ultra II DNA library Prep  
 413 Kit for Illumina (NEB Cat# E7645S) according to the manufacturers' instructions.  
 414 Fragments between 400 and 600 bp were paired-end sequenced on an Illumina  
 415 Nova-seq PE150 platform.

416

## 417 **Construction of contact map and chromosome 3D model**

418 After quality filtering using Trimmomatic (version 0.38), the clean Hi-C data two  
 419 biological replicates for sample yZSJ025, was iteratively mapped to the yZSJ025  
 420 genome using the ICE software package (version 1f8815d0cc9e). Dangling ends and  
 421 other unusable data were filtered, the valid pairs were used to analyze the correlation  
 422 efficiency of the two biological replicates for each sample using QuASAR-Rep  
 423 analysis (3DChromatin-ReplicateQC v0.0.1), then we pooled the data from two  
 424 replicates together for further analysis. Valid pairs after pooling were binned into 1  
 425 Kb and 10 Kb nonoverlapping genomic intervals to generate contact maps. Raw Hi-C  
 426 contact maps were normalized using iterative normalization method to eliminate  
 427 systematic biases. The chromosomal 3D structure of the strain was inferred using the

428 Pastis (v0.1) method<sup>56</sup>. with a multidimensional scaling (MDS) model. The 10-kb  
429 contact maps were used to construct the 3D model.

430

### 431 **Statistical analysis**

432 Statistical analysis was performed using R (<http://www.r-project.org/>) or GraphPad  
433 Prism 8.0. Significance was determined via two-tailed, two-sample t tests. Pearson  
434 correlation analysis was applied to determine the correlation coefficient (r) and  
435 associated *p* values. A *p* value of  $\leq 0.05$  was considered statistically significant.

### 436 **Acknowledgments**

437 We thank Jef D. Boeke from NYU Langone Health for many discussions and advice.  
438 We also thank Stephanie Lauer for helpful comments during manuscript preparation.  
439 We are grateful to Jef D. Boeke and Leslie A. Mitchell from NYU Langone Health,  
440 Huanming Yang, Yue Shen, Yun Wang and Tai Chen from BGI-Shenzhen, Yizhi Cai  
441 from the University of Manchester, for strain sharing and technical supports. This  
442 work is part of the Synthetic Yeast Genome Project (<http://syntheticyeast.org/sc2-0/>).  
443 This work was funded by the National Key Research and Development Program of  
444 China (2021YFC2100800) and the National Natural Science Foundation of China  
445 (21621004, 31861143017, 31971351). Fig.5 was created with BioRender.com.

446

### 447 **Author contributions:**

448 Conceptualization: YJY, YW; experiments: SZ, YZ, ZZ; analysis: YJY, YW, SZ, ZZ,  
449 LJ, LL; writing: YJY, YW, SZ, YZ, JT.

450

451 **Competing interests:** Authors declare no competing interests.

452

453 **Data and materials availability:** Genome sequencing data have been submitted to

454 NCBI Sequence Read Archive (SRA) under accession number PRJNA705059. The

455 ATAC-seq and Hi-C sequencing data have been submitted to NCBI Gene Expression

456 Omnibus (GEO) under accession number GSE168182. The ATAC-seq data of wild

457 type *S. cerevisiae* is from GEO under accession number GSE66386.

# References:

1. Good BH *et al.* The dynamics of molecular evolution over 60,000 generations. *Nature* **551**, 45-50 (2017).
2. Jasinska W *et al.* Chromosomal barcoding of *E. coli* populations reveals lineage diversity dynamics at high resolution. *Nat. Ecol. Evol.* **4**, 437-452 (2020).
3. Johnson MS, Martsul A, Kryazhimskiy S, Desai MM. Higher-fitness yeast genotypes are less robust to deleterious mutations. *Science* **366**, 490-493 (2019).
4. Nguyen Ba AN *et al.* High-resolution lineage tracking reveals travelling wave of adaptation in laboratory yeast. *Nature* **575**, 494-499 (2019).
5. Peter J, Schacherer J. Population genomics of yeasts: towards a comprehensive view across a broad evolutionary scale. *Yeast* **33**, 73-81 (2016).
6. Gallone B *et al.* Domestication and divergence of *Saccharomyces cerevisiae* beer yeasts. *Cell* **166**, 1397-1410 (2016).
7. Botstein D, Fink GR. Yeast: an experimental organism for 21st century biology. *Genetics* **189**, 695-704 (2011).
8. Peter J *et al.* Genome evolution across 1,011 *Saccharomyces cerevisiae* isolates. *Nature* **556**, 339-344 (2018).
9. Shen X *et al.* Tempo and mode of genome evolution in the budding yeast subphylum. *Cell* **175**, 1533-1545 (2018).
10. Marsit S *et al.* Evolutionary biology through the lens of budding yeast comparative genomics. *Nat. Rev. Genet.* **18**, 581-598 (2017).
11. Yue J *et al.* Contrasting evolutionary genome dynamics between domesticated and wild yeasts.

- 480 *Nat. Genet.* **49**, 913-924 (2017).
- 481 12. Dujon B. Yeast evolutionary genomics. *Nat. Rev. Genet.* **11**, 512-524 (2010).
- 482 13. Hutchison CA *et al.* Design and synthesis of a minimal bacterial genome. *Science* **351**, d6253
- 483 (2016).
- 484 14. Ostrov N *et al.* Design, synthesis, and testing toward a 57-codon genome. *Science* **353**, 819-822
- 485 (2016).
- 486 15. Fredens J *et al.* Total synthesis of *Escherichia coli* with a recoded genome. *Nature* **569**, 514-518
- 487 (2019).
- 488 16. Richardson SM *et al.* Design of a synthetic yeast genome. *Science* **355**, 1040-1044 (2017).
- 489 17. Chen W *et al.* An artificial chromosome for data storage. *Natl Sci Rev* **8**, b28 (2021).
- 490 18. Lu X, Ellis T. Self-replicating digital data storage with synthetic chromosomes. *Natl Sci Rev* **8**
- 491 (2021).
- 492 19. Dymond JS *et al.* Synthetic chromosome arms function in yeast and generate phenotypic diversity
- 493 by design. *Nature* **477**, 471-476 (2011).
- 494 20. Blount BA *et al.* Rapid host strain improvement by in vivo rearrangement of a synthetic yeast
- 495 chromosome. *Nat Commun* **9**, 1932 (2018).
- 496 21. Jia B *et al.* Precise control of SCRaMbLE in synthetic haploid and diploid yeast. *Nat Commun* **9**,
- 497 1-13 (2018).
- 498 22. Liu W *et al.* Rapid pathway prototyping and engineering using in vitro and in vivo synthetic
- 499 genome SCRaMbLE-in methods. *Nat Commun* **9**, 1936 (2018).
- 500 23. Luo Z *et al.* Identifying and characterizing SCRaMbLEd synthetic yeast using ReSCuES. *Nat*
- 501 *Commun* **9**, 1-10 (2018).



- 502 24. Shen MJ *et al.* Heterozygous diploid and interspecies SCRaMbLEing. *Nat Commun* **9**, 1-8 (2018).
- 503 25. Shen Y *et al.* SCRaMbLE generates designed combinatorial stochastic diversity in synthetic  
504 chromosomes. *Genome Res.* **26**, 36-49 (2016).
- 505 26. Wang J *et al.* Ring synthetic chromosome V SCRaMbLE. *Nat Commun* **9**, 3783 (2018).
- 506 27. Wu Y *et al.* In vitro DNA SCRaMbLE. *Nat Commun* **9**, 1935-1939 (2018).
- 507 28. Mitchell LA *et al.* Synthesis, debugging, and effects of synthetic chromosome consolidation:  
508 synVI and beyond. *Science* **355**, f4831 (2017).
- 509 29. Shen Y *et al.* Deep functional analysis of synII, a 770-kilobase synthetic yeast chromosome.  
510 *Science* **355**, f4791 (2017).
- 511 30. Wu Y *et al.* Bug mapping and fitness testing of chemically synthesized chromosome X. *Science*  
512 **355**, f4706 (2017).
- 513 31. Xie Z *et al.* "Perfect" designer chromosome V and behavior of a ring derivative. *Science* **355**,  
514 f4704 (2017).
- 515 32. Annaluru N *et al.* Total synthesis of a functional designer eukaryotic chromosome. *Science* **344**,  
516 55-58 (2014).
- 517 33. Lin Q, Qi H, Wu Y, Yuan Y. Robust orthogonal recombination system for versatile genomic  
518 elements rearrangement in yeast *Saccharomyces cerevisiae*. *Sci Rep-Uk* **5**, 15249 (2015).
- 519 34. Karimova M *et al.* Vika/vox, a novel efficient and specific Cre/loxP-like site-specific  
520 recombination system. *Nucleic Acids Res.* **41**, e37 (2013).
- 521 35. Schep AN *et al.* Structured nucleosome fingerprints enable high-resolution mapping of chromatin  
522 architecture within regulatory regions. *Genome Res.* **25**, 1757-1770 (2015).
- 523 36. Duan Z *et al.* A three-dimensional model of the yeast genome. *Nature* **465**, 363-367 (2010).

524 37. Mercy G *et al.* 3D organization of synthetic and scrambled chromosomes. *Science* **355**, f4597  
525 (2017).

526 38. Wang P *et al.* SCRaMbLEing of a synthetic yeast chromosome with clustered essential genes  
527 reveals synthetic lethal interactions. *Acs Synth Biol* **9**, 1181-1189 (2020).

528 39. Guo F, Gopaul DN, Van Duyne GD. Structure of Cre recombinase complexed with DNA in a  
529 site-specific recombination synapse. *Nature* **389**, 40-46 (1997).

530 40. Ames RM *et al.* Gene duplication and environmental adaptation within yeast populations.  
531 *Genome Biol Evol* **2**, 591-601 (2010).

532 41. Bergström A *et al.* A high-definition view of functional genetic variation from natural yeast  
533 genomes. *Mol. Biol. Evol.* **31**, 872-888 (2014).

534 42. Brown CA, Murray AW, Verstrepen KJ. Rapid expansion and functional divergence of  
535 subtelomeric gene families in yeasts. *Curr. Biol.* **20**, 895-903 (2010).

536 43. Parker R. RNA degradation in *Saccharomyces cerevisiae*. *Genetics* **191**, 671-702 (2012).

537 44. Yadav V, Sun S, Coelho MA, Heitman J. Centromere scission drives chromosome shuffling and  
538 reproductive isolation. *P. Natl Acad. Sci. Usa* **117**, 7917-7928 (2020).

539 45. Guin K *et al.* Spatial inter-centromeric interactions facilitated the emergence of evolutionary new  
540 centromeres. *Elife* **9**, e58556 (2020).

541 46. Sankaranarayanan SR *et al.* Loss of centromere function drives karyotype evolution in closely  
542 related *Malassezia* species. *Elife* **9**, e53944 (2020).

543 47. Hadi K *et al.* Distinct Classes of Complex Structural Variation Uncovered across Thousands of  
544 Cancer Genome Graphs. *Cell* **183**, 197-210 (2020).

545 48. Zhang Y *et al.* Spatial organization of the mouse genome and its role in recurrent chromosomal

translocations. *Cell* **148**, 908-921 (2012).

49. Fudenberg G, Getz G, Meyerson M, Mirny LA. High order chromatin architecture shapes the landscape of chromosomal alterations in cancer. *Nat. Biotechnol.* **29**, 1109-1113 (2011).

50. Pinglay S *et al.* Synthetic genomic reconstitution reveals principles of mammalian Hox cluster regulation. *bioRxiv*, 2021-2027 (2021).

51. Zhao Y *et al.* Debugging and consolidating multiple synthetic chromosomes reveals combinatorial genetic interactions. *bioRxiv*, 2022-2024 (2022).

52. Gibson DG *et al.* Enzymatic assembly of DNA molecules up to several hundred kilobases. *Nat. Methods* **6**, 343-345 (2009).

53. Gietz RD, Schiestl RHW, A. R. Woods R. Studies on the transformation of intact yeast cells by the LiAc/SS-DNA/PEG procedure. *Yeast* **11**, 355-360 (1995).

54. Zhang Y *et al.* Model-based Analysis of ChIP-Seq (MACS). *Genome Biol.* **9**, R137 (2008).

55. Lieberman-Aiden E *et al.* Comprehensive mapping of long-range interactions reveals folding principles of the human genome. *Science* **326**, 289-293 (2009).

56. Varoquaux N, Ay F, Noble WS, Vert JP. A statistical approach for inferring the 3D structure of the genome. *Bioinformatics* **30**, i26-i33 (2014).

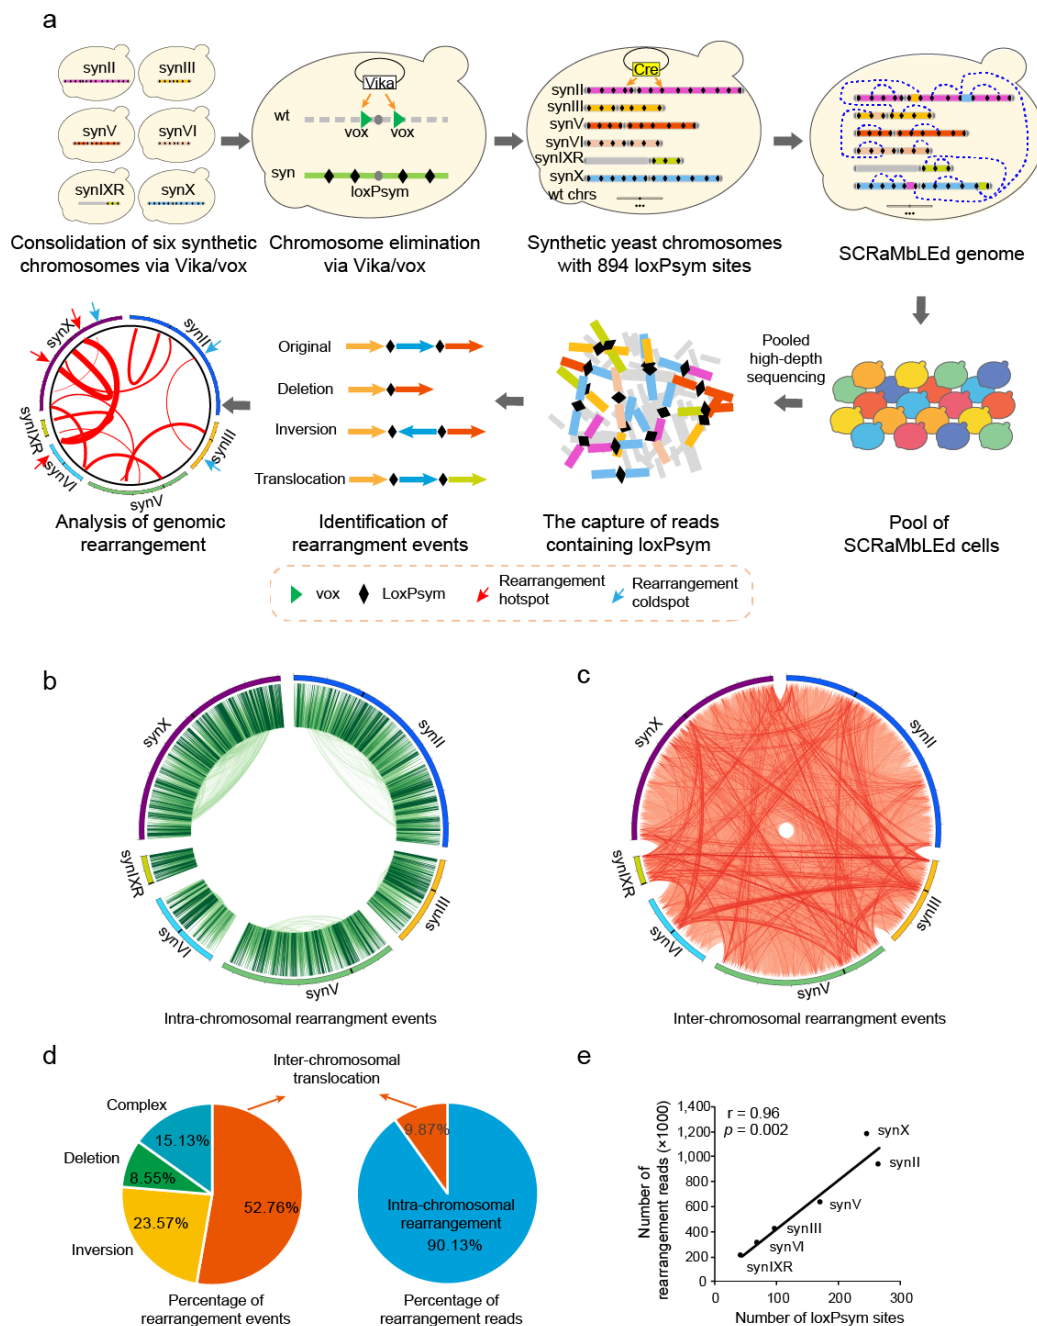

563

564 **Fig.1 Consolidation and SCRaMbLE of six synthetic chromosomes.**

565 **a**, Schematic diagram showing the construction of the synthetic yeast strain yZSJ025

566 and the analysis of rearrangement events following SCRaMbLE. **b**, Circos plot of

567 intra- chromosomal rearrangement events in yZSJ025. **c**, Circos plot of

568 inter-chromosomal rearrangement events in yZSJ025. In (a) and (c), two loxPsym  
569 sites where rearrangement events occur are connected with a line, with its intensity  
570 representing the frequency of this event. **d**, Classifications of rearrangement events  
571 with percentages of different groups calculated by event numbers and read numbers  
572 respectively. Different groups of events are labeled in different colors as indicated. **e**,  
573 Correlation analyses between the rearrangement frequency and the number of  
574 loxPsym sites on each chromosome. Pearson correlation analysis was applied to  
575 determine the correlation coefficient and associated p values.

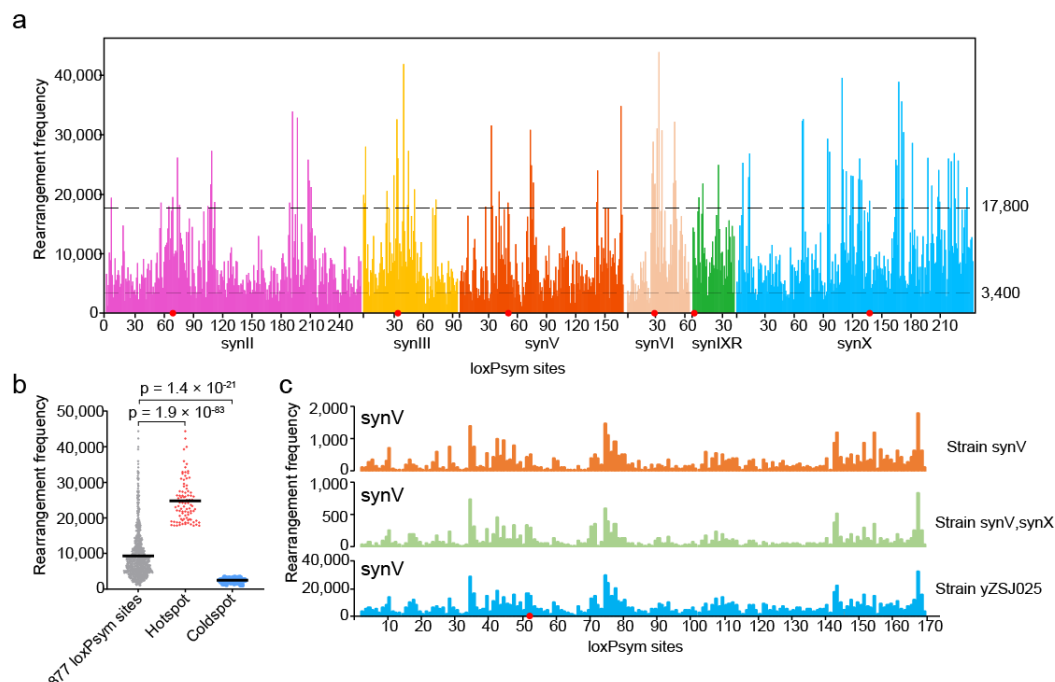

576

577 **Fig.2 Investigating rearrangement frequencies revealed a specific rearrangement**  
578 **pattern among synthetic yeast chromosomes.**

579 **a**, Landscape of rearrangement frequencies along synII, synIII, synV, synVI, synIXR  
580 and synX. 17 loxP sites were initially inserted at the synthetic telomere regions,  
581 with flanking sequences not distinguishable from each other. They were excluded  
582 from the identification of rearrangements reads. **b**, Comparison of rearrangement  
583 frequencies between hotspots and coldspots. Rearrangement frequencies of hotspots,  
584 coldspots and all 877 loxP sites. The points represent the rearrangement  
585 frequencies of each loxP site. Horizontal lines indicate weighted means. The  $p$   
586 values were calculated using two-tailed paired two-sample  $t$ -tests. **c**,  
587 Intra-chromosomal rearrangement patterns of synV following SCRaMbLE in three  
588 different yeast strains, yXZX846 (synV), yYW169 (synV, synX) and yZSJ025

589 respectively. Pearson correlation analysis was applied to determine the correlation

590 coefficient and associated p values. For (a) and (c), red dots indicate centromeres.

591

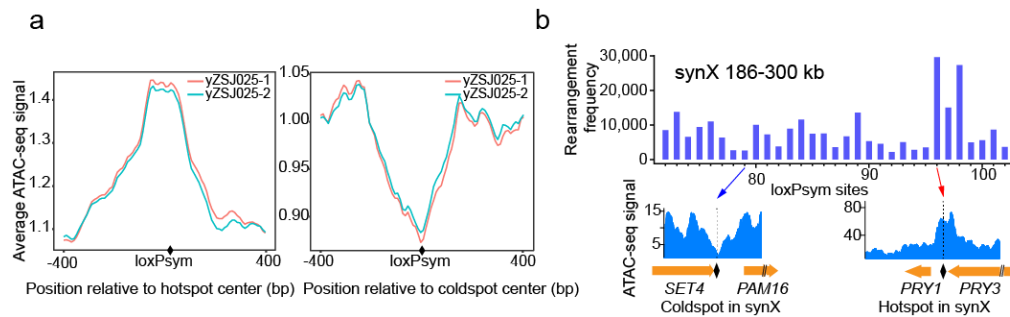

592

593 **Fig.3 Rearrangement frequency in correlation with chromatin accessibility.**

594 **a**, Average ATAC-seq signals of the hotspot- and coldspot-centered 800 bp regions. **b**,

595 ATAC-seq signals for a typical rearrangement hotspot and a coldspot in the 186-300

596 kb region of synX.

597



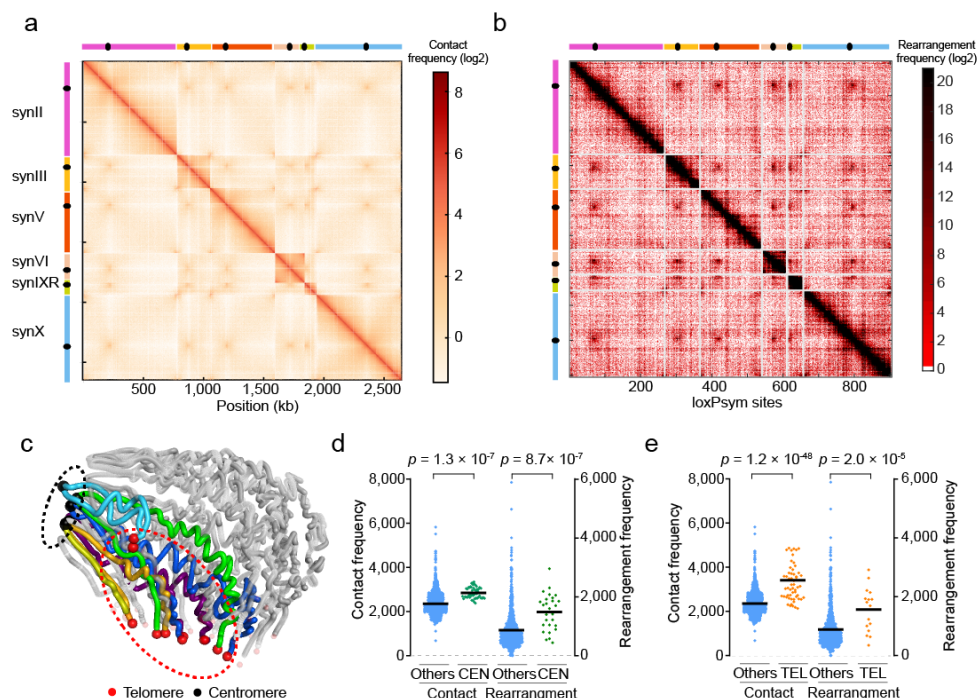

598

# 599 **Fig.4 Rearrangement frequency in correlation with 3D chromosome**

600 **conformation. a**, Hi-C heatmap. The heatmap value for a site ( $i, j$ ) is the contact

601 probability (log2) between genomic loci  $i$  (horizontal axis) and  $j$  (vertical axis). Both

602 axes are displayed at a 1 kb resolution. Spots with different heatmap values from low

603 to high are colored from light yellow to red as indicated. **b**, Rearrangement frequency

604 heatmap. The heatmap value for a site ( $i, j$ ) is the rearrangement frequency (log2) of

605 the event occurring at the loci  $i$  (vertical axis) and  $j$  (horizontal axis). Spots with

606 different heatmap values are labeled in red with different intensities as indicated. **c**,

607 3D structures of synthetic chromosomes inferred from the Hi-C contact map

608 displayed in panel (a). Synthetic chromosomes are labeled with different colors and

609 the native chromosomes are shown in grey. Centromeres and telomeres were

610 represented by dark and red spheres respectively. **d**, Comparisons of the contact  
611 probability and frequency of rearrangement events at loci in pericentromeric regions  
612 (CEN) and in other regions (Others). The CEN are centromere-centered 10 kb regions.  
613 **e**, Comparisons of the contact probability and frequency of rearrangement events at  
614 loci in peritelomeric regions (TEL) and in other regions (Others). The TEL are  $\leq 5$  kb  
615 from telomeres. For (d) and (e), each data point represents 1 kb bin in regions as  
616 indicated. Horizontal lines indicate weighted means. The  $p$  values were calculated  
617 using two-tailed paired two-sample  $t$ -tests.

618

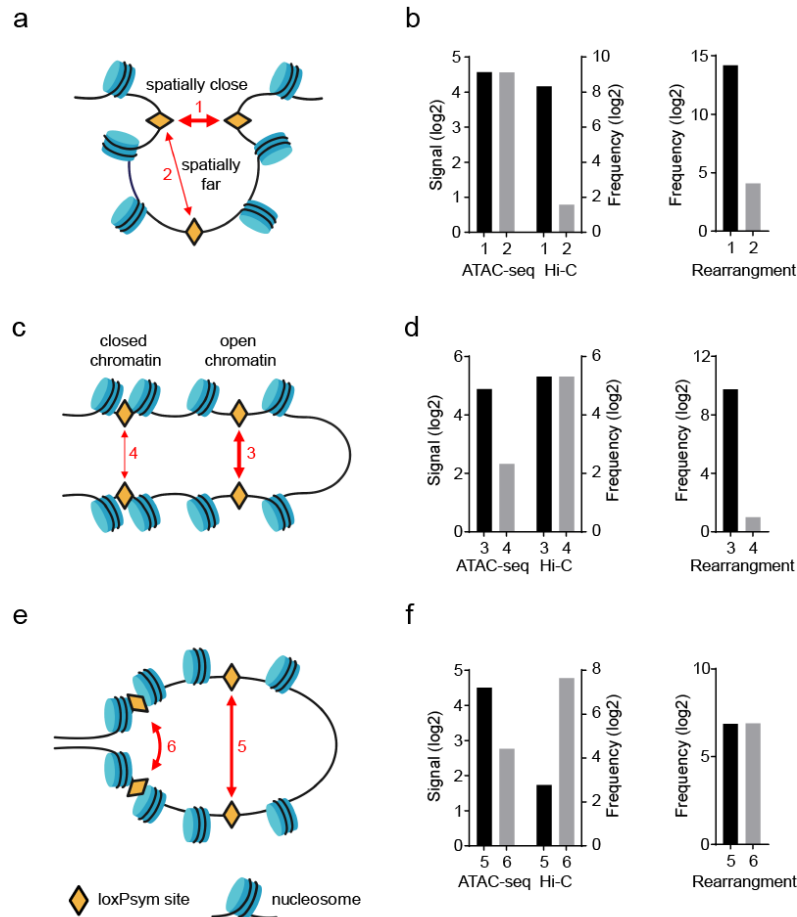

619

620 **Fig.5 Mechanistic models of the effects of hierarchical chromatin organization on**  
621 **chromosomal rearrangement.**

622 **a**, A schematic model interpreting the difference of the frequencies of two  
623 rearrangement events with different contact probability. **b**, The loxP sites of  
624 pair 1: synX 183 kb and synX 184 kb; pair 2: synX 184 kb and synX 342 kb. **c**, A  
625 schematic model interpreting the difference of the frequencies of two rearrangement  
626 events with different chromatin accessibility. **d**, The loxP sites of pair 3:  
627 synII 186 kb and synII 204 kb; pair 4: synV 346 kb and synV 384 kb. **e**, A schematic

628 model interpreting two rearrangement events with similar frequencies as a result of  
 629 counter-effects by contact probability and chromatin accessibility. **f**, The loxPsym  
 630 positions of pair 5: synVI 125 kb and synVI 202 kb; pair 6: synII 504 kb and synII  
 631 507 kb.
